# Supplementary material for: Evolution of the Apicomplexan Sugar Transporter Gene Family Repertoire
Source: Hindawi journal article supplement (doi:10.1155/2017/1707231), 2017-01-01
Supplement: f1 [file 1707231.f1.pdf]

## Supplementary Figures and Tables

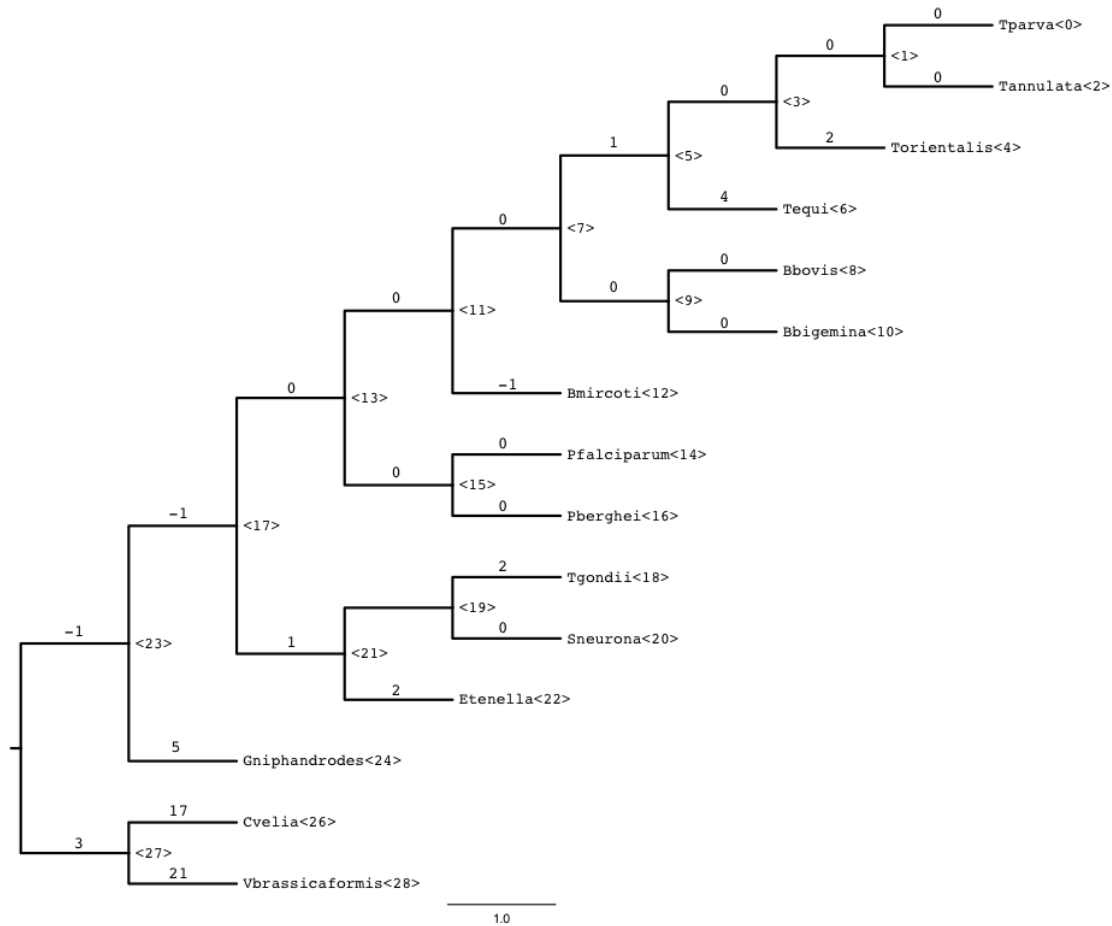

### Supplementary Figure 1: CAFE estimations of expansions and contractions in the apicomplexan sugar transporter gene family

The phylogenetic tree shows the mean number of sugar transporters gained or lost per node. Minus indicates a net contraction. Nodes are numbered in angle brackets. The phylogenetic tree was generated by a Bayesian approach using representative sugar transporter protein sequences from clades 1 and 2 (Figure 2).

### Supplementary Table 1: Species information and sequence sources

| Species                     | Strain   | NCBI Taxon ID | Sequence Source | Database URL                                                  | Database Version |
|-----------------------------|----------|---------------|-----------------|---------------------------------------------------------------|------------------|
| <i>Babesia bigemina</i>     | BOND     | 5866          | PiroplasmaDB    | <a href="http://piroplasmadb.org">http://piroplasmadb.org</a> | release 25       |
| <i>Babesia bovis</i>        | T2Bo     | 484906        | PiroplasmaDB    | <a href="http://piroplasmadb.org">http://piroplasmadb.org</a> | release 25       |
| <i>Babesia microti</i>      | RI       | 1133968       | PiroplasmaDB    | <a href="http://piroplasmadb.org">http://piroplasmadb.org</a> | release 25       |
| <i>Theileria annulata</i>   | Ankara   | 353154        | PiroplasmaDB    | <a href="http://piroplasmadb.org">http://piroplasmadb.org</a> | release 25       |
| <i>Theileria equi</i>       | WA       | 1537102       | PiroplasmaDB    | <a href="http://piroplasmadb.org">http://piroplasmadb.org</a> | release 25       |
| <i>Theileria orientalis</i> | Shintoku | 869250        | PiroplasmaDB    | <a href="http://piroplasmadb.org">http://piroplasmadb.org</a> | release 25       |

|                                |           |         |              |                                                               |            |
|--------------------------------|-----------|---------|--------------|---------------------------------------------------------------|------------|
| <i>Theileria parva</i>         | Muguga    | 333668  | PiroplasmaDB | <a href="http://piroplasmadb.org">http://piroplasmadb.org</a> | release 25 |
| <i>Cryptosporidium hominis</i> | TU502     | 353151  | CryptoDB     | <a href="http://cryptodb.org">http://cryptodb.org</a>         | release 25 |
| <i>Cryptosporidium muris</i>   | RN66      | 441375  | CryptoDB     | <a href="http://cryptodb.org">http://cryptodb.org</a>         | release 25 |
| <i>Cryptosporidium parvum</i>  | Iowa II   | 353152  | CryptoDB     | <a href="http://cryptodb.org">http://cryptodb.org</a>         | release 25 |
| <i>Gregarina niphandrodes</i>  | unknown   | 110365  | CryptoDB     | <a href="http://cryptodb.org">http://cryptodb.org</a>         | release 25 |
| <i>Chromera velia</i>          | CCMP2878  | 1169474 | CryptoDB     | <a href="http://cryptodb.org">http://cryptodb.org</a>         | release 25 |
| <i>Vitrella brassicaformis</i> | CCMP3155  | 1169540 | CryptoDB     | <a href="http://cryptodb.org">http://cryptodb.org</a>         | release 25 |
| <i>Eimeria tenella</i>         | Houghton  | 413949  | ToxoDB       | <a href="http://toxodb.org">http://toxodb.org</a>             | release 25 |
| <i>Hammondia hammondi</i>      | H.H.34    | 99158   | ToxoDB       | <a href="http://toxodb.org">http://toxodb.org</a>             | release 25 |
| <i>Neospora caninum</i>        | Liverpool | 572307  | ToxoDB       | <a href="http://toxodb.org">http://toxodb.org</a>             | release 25 |
| <i>Sarcocystis neurona</i>     | SN3       | 42890   | ToxoDB       | <a href="http://toxodb.org">http://toxodb.org</a>             | release 25 |
| <i>Toxoplasma gondii</i>       | ME49      | 508771  | ToxoDB       | <a href="http://toxodb.org">http://toxodb.org</a>             | release 25 |
| <i>Plasmodium berghei</i>      | ANKA      | 5823    | PlasmoDB     | <a href="http://plasmodb.org">http://plasmodb.org</a>         | release 25 |
| <i>Plasmodium falciparum</i>   | 3D7       | 36329   | PlasmoDB     | <a href="http://plasmodb.org">http://plasmodb.org</a>         | release 25 |
| <i>Plasmodium chabaudi</i>     | chabaudi  | 31271   | PlasmoDB     | <a href="http://plasmodb.org">http://plasmodb.org</a>         | release 25 |
| <i>Plasmodium knowlesi</i>     | H         | 5851    | PlasmoDB     | <a href="http://plasmodb.org">http://plasmodb.org</a>         | release 25 |
| <i>Plasmodium vivax</i>        | Sal-1     | 126793  | PlasmoDB     | <a href="http://plasmodb.org">http://plasmodb.org</a>         | release 25 |
| <i>Plasmodium yoelii</i>       | 17X       | 352914  | PlasmoDB     | <a href="http://plasmodb.org">http://plasmodb.org</a>         | release 25 |

**Supplementary Table 2: Parameters for *in silico* tools**

| <b>Tool</b> | <b>Parameters</b>                                                  |
|-------------|--------------------------------------------------------------------|
| OrthoMCL    | BLAST E-value cutoff: 1e-30                                        |
|             | Inflation: 1.5                                                     |
|             | P-value cutoff: 1e-05                                              |
|             | P-ident cutoff: 0                                                  |
|             | P-match cutoff: 0                                                  |
|             |                                                                    |
| Pfam        | e-value cutoff: 1e-05                                              |
|             | pfam DB version: 27.0                                              |
|             | accession number: PF00083                                          |
|             |                                                                    |
| HMMER       | e-value cutoff: 1e-05                                              |
|             |                                                                    |
| tBLASTn     | e-value cutoff: 1e-06                                              |
|             | query: identified sugar transporters                               |
|             | subject: assembled genome sequences of the 22 species              |
|             |                                                                    |
| CAFE v3     | P-value: 0.050000                                                  |
|             | Num of Random: 1000                                                |
|             | Lambda : 1.98162354082669 Mu : 0.73467469847160 & Score: 41.100357 |
|             |                                                                    |
| TargetP 1.1 | Organism group: Non-plant                                          |
|             | Cutoffs: winner-takes-all (default)                                |
|             |                                                                    |
| SignalP 4.1 | Organism group: Eukaryotes                                         |
|             | D-cutoff values: optimized for correlation                         |

**Supplementary Table 3: Sugar transporter gene identifiers and aliases**

| <b>EupathDB Gene ID</b> | <b>Alias used in Phylogenetic Tree</b> | <b>Organism</b>                |
|-------------------------|----------------------------------------|--------------------------------|
| cgd4_2870               | cgd4_2870                              | <i>Cryptosporidium parvum</i>  |
| cgd3_4070               | cgd3_4070                              | <i>Cryptosporidium parvum</i>  |
| Vbra_9656               | Vbra_9656                              | <i>Vitrella brassicaformis</i> |
| Vbra_8597               | Vbra_8597                              | <i>Vitrella brassicaformis</i> |
| Vbra_6646               | Vbra_6646                              | <i>Vitrella brassicaformis</i> |
| Vbra_6177               | Vbra_6177                              | <i>Vitrella brassicaformis</i> |
| Vbra_2748               | Vbra_2748                              | <i>Vitrella brassicaformis</i> |
| Vbra_23072              | Vbra_23072                             | <i>Vitrella brassicaformis</i> |
| Vbra_22558              | Vbra_22558                             | <i>Vitrella brassicaformis</i> |
| Vbra_22414              | Vbra_22414                             | <i>Vitrella brassicaformis</i> |
| Vbra_22413              | Vbra_22413                             | <i>Vitrella brassicaformis</i> |
| Vbra_21888              | Vbra_21888                             | <i>Vitrella brassicaformis</i> |
| Vbra_216                | Vbra_216                               | <i>Vitrella brassicaformis</i> |
| Vbra_20903              | Vbra_20903                             | <i>Vitrella brassicaformis</i> |
| Vbra_20539              | Vbra_20539                             | <i>Vitrella brassicaformis</i> |
| Vbra_20505              | Vbra_20505                             | <i>Vitrella brassicaformis</i> |
| Vbra_19180              | Vbra_19180                             | <i>Vitrella brassicaformis</i> |
| Vbra_18889              | Vbra_18889                             | <i>Vitrella brassicaformis</i> |
| Vbra_15257              | Vbra_15257                             | <i>Vitrella brassicaformis</i> |
| Vbra_14168              | Vbra_14168                             | <i>Vitrella brassicaformis</i> |
| Vbra_14092              | Vbra_14092                             | <i>Vitrella brassicaformis</i> |
| Vbra_1341               | Vbra_1341                              | <i>Vitrella brassicaformis</i> |
| Vbra_12593              | Vbra_12593                             | <i>Vitrella brassicaformis</i> |
| Vbra_12299              | Vbra_12299                             | <i>Vitrella brassicaformis</i> |
| Vbra_12134              | Vbra_12134                             | <i>Vitrella brassicaformis</i> |
| Vbra_11601              | Vbra_11601                             | <i>Vitrella brassicaformis</i> |
| TP03_0064               | Tp_HTL3s                               | <i>Theileria parva</i>         |
| TP03_0063               | Tp_HTL1                                | <i>Theileria parva</i>         |
| TP01_1069               | Tp_HTL2                                | <i>Theileria parva</i>         |
| TOT_030000803           | ToHTL4                                 | <i>Theileria orientalis</i>    |
| TOT_030000802           | ToHTL5                                 | <i>Theileria orientalis</i>    |
| TOT_020000891           | ToHTL2                                 | <i>Theileria orientalis</i>    |
| TOT_010001273           | ToHTL3                                 | <i>Theileria orientalis</i>    |
| TOT_010001014           | ToHTL1                                 | <i>Theileria orientalis</i>    |
| TGME49_272500           | TgST2                                  | <i>Toxoplasma gondii</i>       |
| TGME49_257120           | TgST1                                  | <i>Toxoplasma gondii</i>       |
| TGME49_235150           | TGME49_235150                          | <i>Toxoplasma gondii</i>       |

|               |               |                               |
|---------------|---------------|-------------------------------|
| TGME49_214320 | TgGT1         | <i>Toxoplasma gondii</i>      |
| TGME49_201260 | TgST3         | <i>Toxoplasma gondii</i>      |
| TA16160       | TaHTL1        | <i>Theileria annulata</i>     |
| TA02485       | TaHTL2        | <i>Theileria annulata</i>     |
| TA02480       | TaHTL3        | <i>Theileria annulata</i>     |
| SN3_00601180  | SnHTL         | <i>Sarcocystis neurona</i>    |
| SN3_00601110  | SN3_00601110  | <i>Sarcocystis neurona</i>    |
| SN3_00202480  | SN3_00202480  | <i>Sarcocystis neurona</i>    |
| PF3D7_0919500 | PF3D7_0919500 | <i>Plasmodium falciparum</i>  |
| PF3D7_0204700 | PfHT1         | <i>Plasmodium falciparum</i>  |
| PBANKA_082040 | PBANKA_082040 | <i>Plasmodium berghei</i>     |
| PBANKA_030250 | PbHT1         | <i>Plasmodium berghei</i>     |
| GNI_143270    | GNI_143270    | <i>Gregarina niphandrodes</i> |
| GNI_134360    | GNI_134360    | <i>Gregarina niphandrodes</i> |
| GNI_123980    | GnHTL4        | <i>Gregarina niphandrodes</i> |
| GNI_060640    | GnHTL3        | <i>Gregarina niphandrodes</i> |
| GNI_060610    | GnHTL2        | <i>Gregarina niphandrodes</i> |
| GNI_060510    | GnHTL1        | <i>Gregarina niphandrodes</i> |
| GNI_045930    | GNI_045930    | <i>Gregarina niphandrodes</i> |
| GNI_027950    | GNI_027950    | <i>Gregarina niphandrodes</i> |
| ETH_00035840  | ETH_00035840  | <i>Eimeria tenella</i>        |
| ETH_00031430  | ETH_00031430  | <i>Eimeria tenella</i>        |
| ETH_00027765  | ETH_00027765  | <i>Eimeria tenella</i>        |
| ETH_00021075  | EtHTL         | <i>Eimeria tenella</i>        |
| ETH_00006715  | ETH_00006715  | <i>Eimeria tenella</i>        |
| Cvel_9429     | Cvel_9429     | <i>Chromera velia</i>         |
| Cvel_846      | Cvel_846      | <i>Chromera velia</i>         |
| Cvel_7759     | Cvel_7759     | <i>Chromera velia</i>         |
| Cvel_7704.1   | Cvel_7704.1   | <i>Chromera velia</i>         |
| Cvel_49       | Cvel_49       | <i>Chromera velia</i>         |
| Cvel_4809     | Cvel_4809     | <i>Chromera velia</i>         |
| Cvel_30289    | Cvel_30289    | <i>Chromera velia</i>         |
| Cvel_27659    | Cvel_27659    | <i>Chromera velia</i>         |
| Cvel_24561    | Cvel_24561    | <i>Chromera velia</i>         |
| Cvel_24236    | Cvel_24236    | <i>Chromera velia</i>         |
| Cvel_23915    | Cvel_23915    | <i>Chromera velia</i>         |
| Cvel_23322    | Cvel_23322    | <i>Chromera velia</i>         |
| Cvel_17783    | Cvel_17783    | <i>Chromera velia</i>         |
| Cvel_16689    | Cvel_16689    | <i>Chromera velia</i>         |

|                |              |                                |
|----------------|--------------|--------------------------------|
| Cvel_16688     | Cvel_16688   | <i>Chromera velia</i>          |
| Cvel_16005     | Cvel_16005   | <i>Chromera velia</i>          |
| Cvel_15239     | Cvel_15239   | <i>Chromera velia</i>          |
| Cvel_14022     | Cvel_14022   | <i>Chromera velia</i>          |
| Cvel_12792     | Cvel_12792   | <i>Chromera velia</i>          |
| Cvel_11951     | Cvel_11951   | <i>Chromera velia</i>          |
| Cvel_11067     | Cvel_11067   | <i>Chromera velia</i>          |
| Cvel_10963.1   | Cvel_10963.1 | <i>Chromera velia</i>          |
| Cvel_10606     | Cvel_10606   | <i>Chromera velia</i>          |
| Chro.40323     | Chro.40323   | <i>Cryptosporidium hominis</i> |
| Chro.30458     | Chro.30458   | <i>Cryptosporidium hominis</i> |
| CMU_032230     | CMU_032230   | <i>Cryptosporidium muris</i>   |
| CMU_017980     | CMU_017980   | <i>Cryptosporidium muris</i>   |
| BEWA_049600    | TeHTL1       | <i>Theileria equi</i>          |
| BEWA_048520    | TeHTL2       | <i>Theileria equi</i>          |
| BEWA_047560    | TeHTL3       | <i>Theileria equi</i>          |
| BEWA_045770    | TeHTL4       | <i>Theileria equi</i>          |
| BEWA_043960    | TeHTL5       | <i>Theileria equi</i>          |
| BEWA_028230    | TeHTL5       | <i>Theileria equi</i>          |
| BEWA_025760    | TeHTL6       | <i>Theileria equi</i>          |
| BBOV_IV003180  | BboHTL1      | <i>Babesia bovis</i>           |
| BBOV_IV003170  | BboHTL2      | <i>Babesia bovis</i>           |
| BBM_III01335   | BmHTL        | <i>Babesia microti</i>         |
| BBBOND_0111000 | Bbi_HTL2     | <i>Babesia bigemina</i>        |
| BBBOND_0110990 | Bbi_HTL1     | <i>Babesia bigemina</i>        |
